# Supplementary material for: The Peach v2.0 release: high-resolution linkage mapping and deep resequencing improve chromosome-scale assembly and contiguity
Source: PubMed Central journal article supplement (PMC5346207; doi:10.1186/s12864-017-3606-9), 2017-03-11

**TxE Pp01**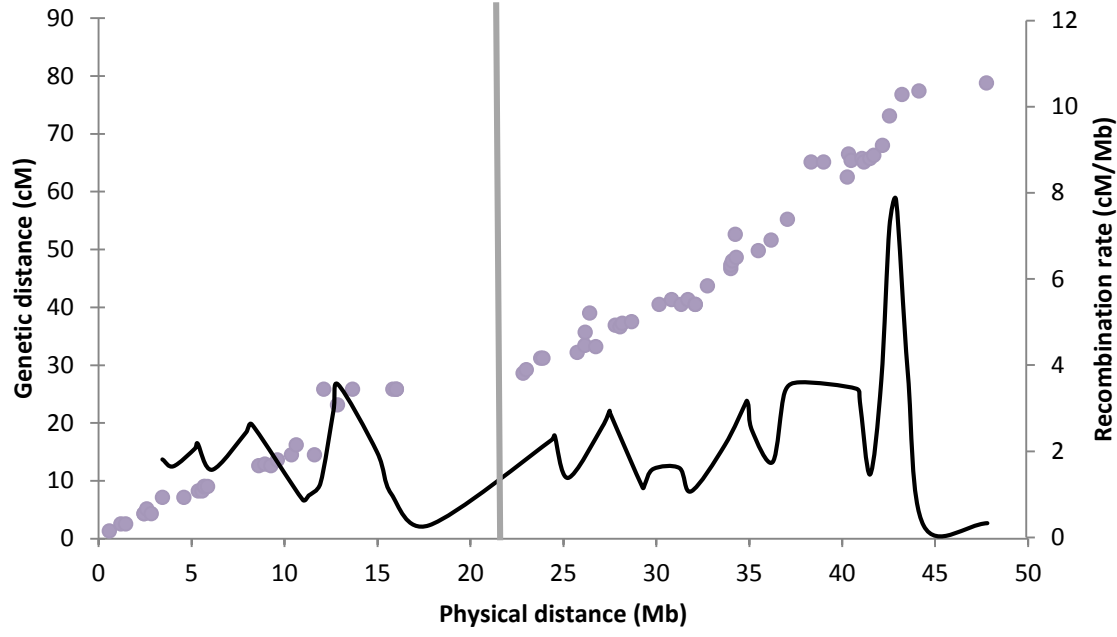**TxE Pp02**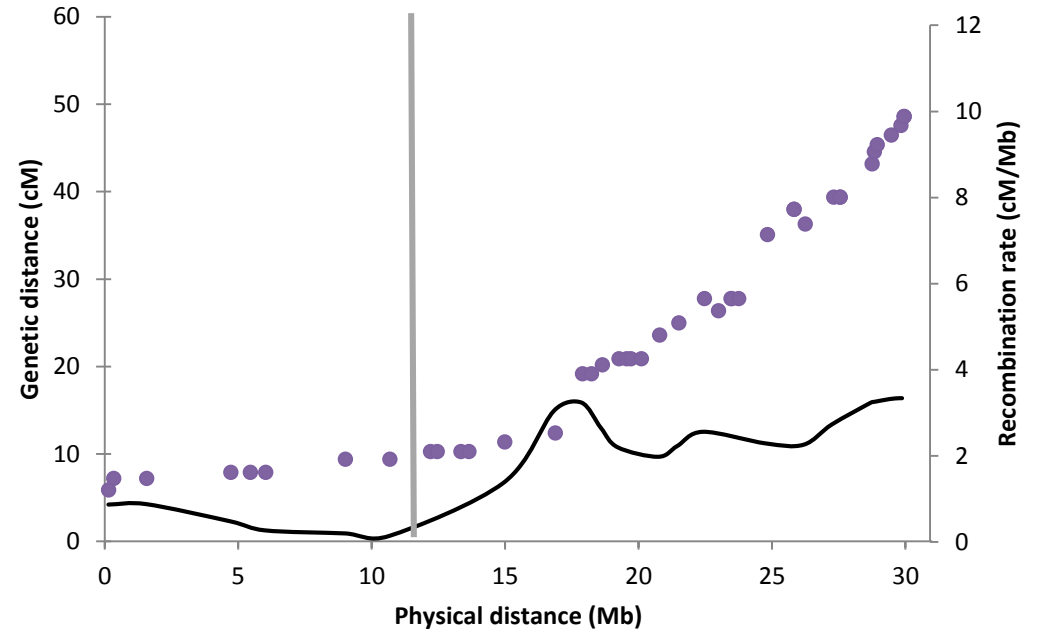**TxE Pp03**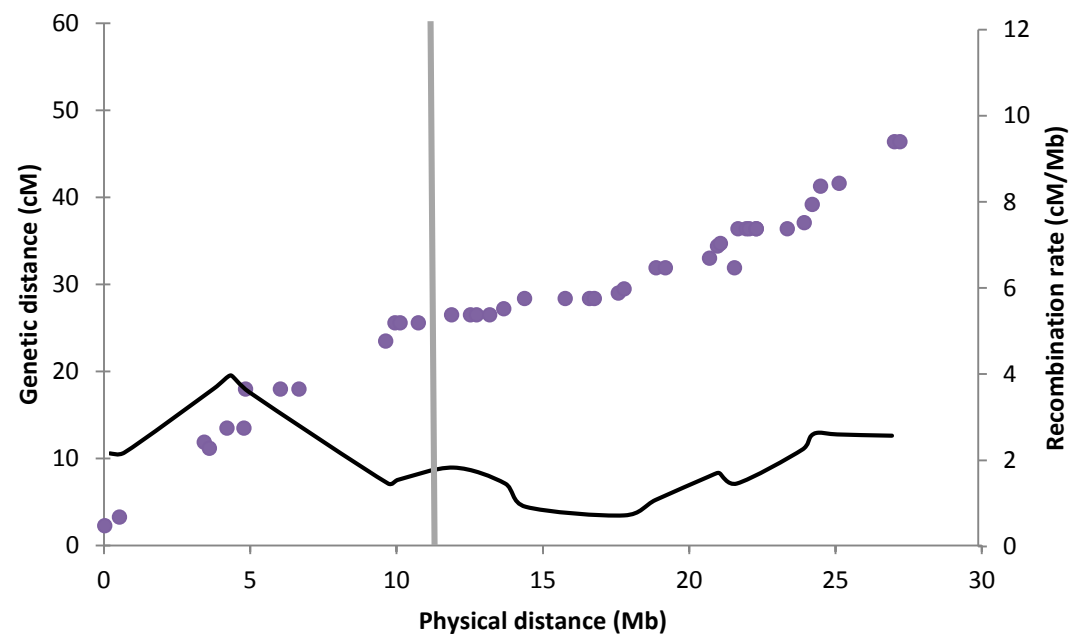**TxE Pp04**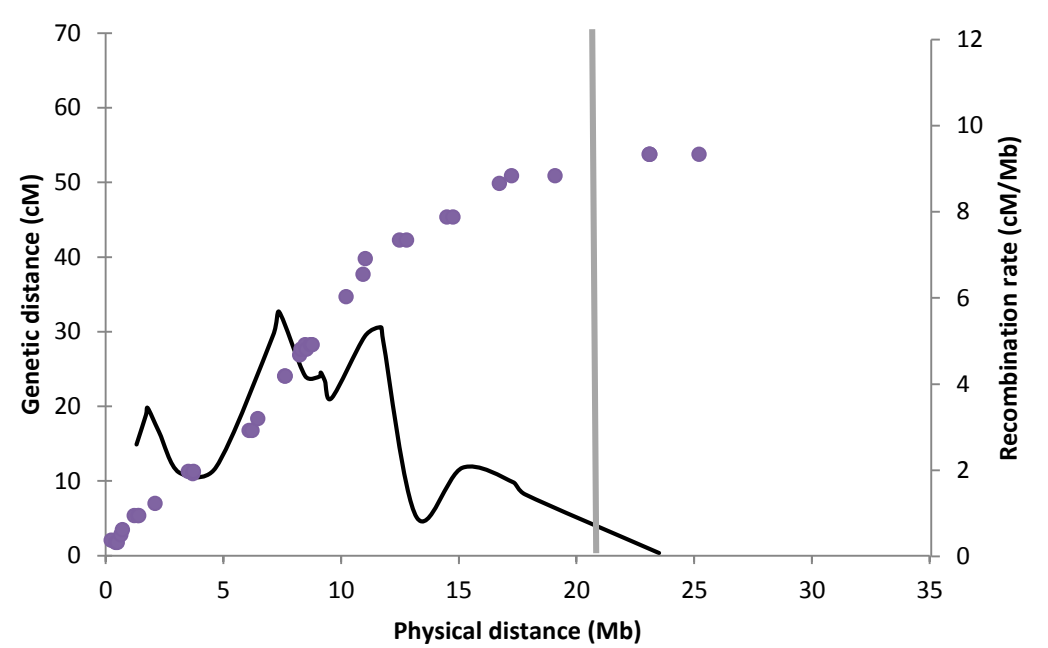**TxE Pp05**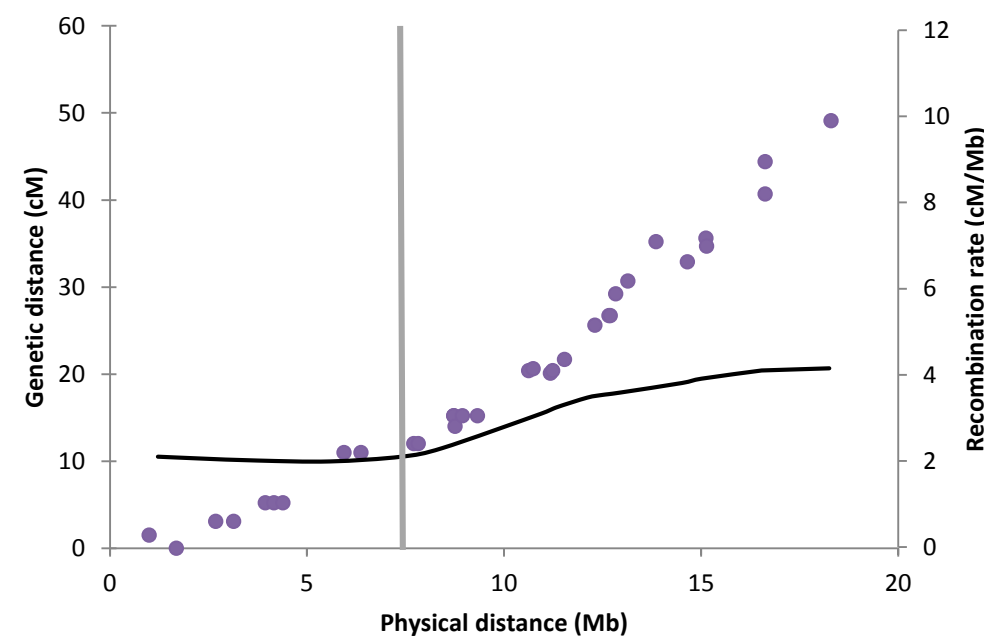**TxE Pp06**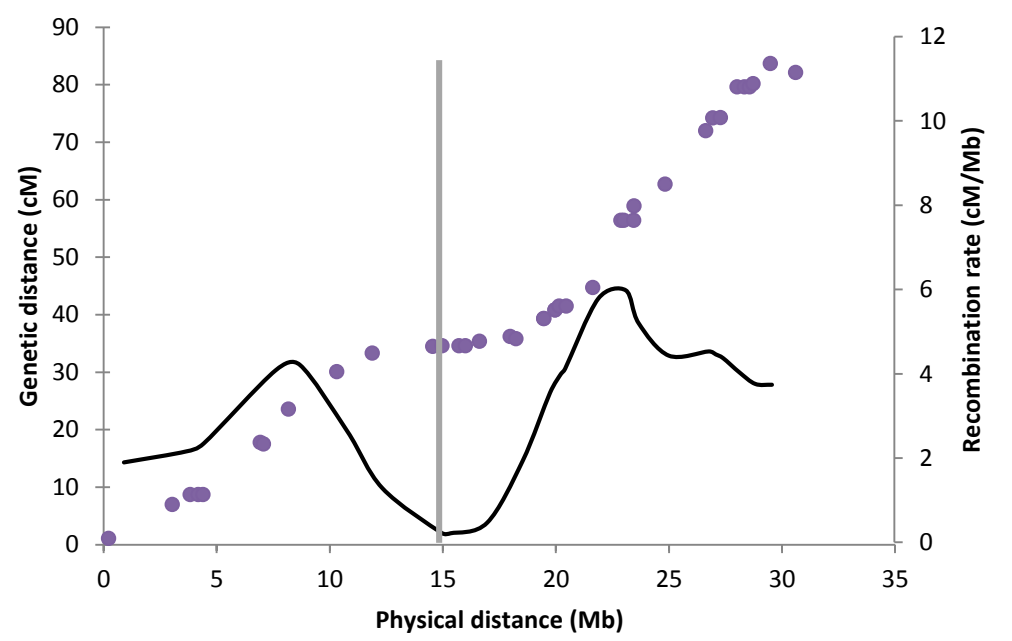**TxE Pp07**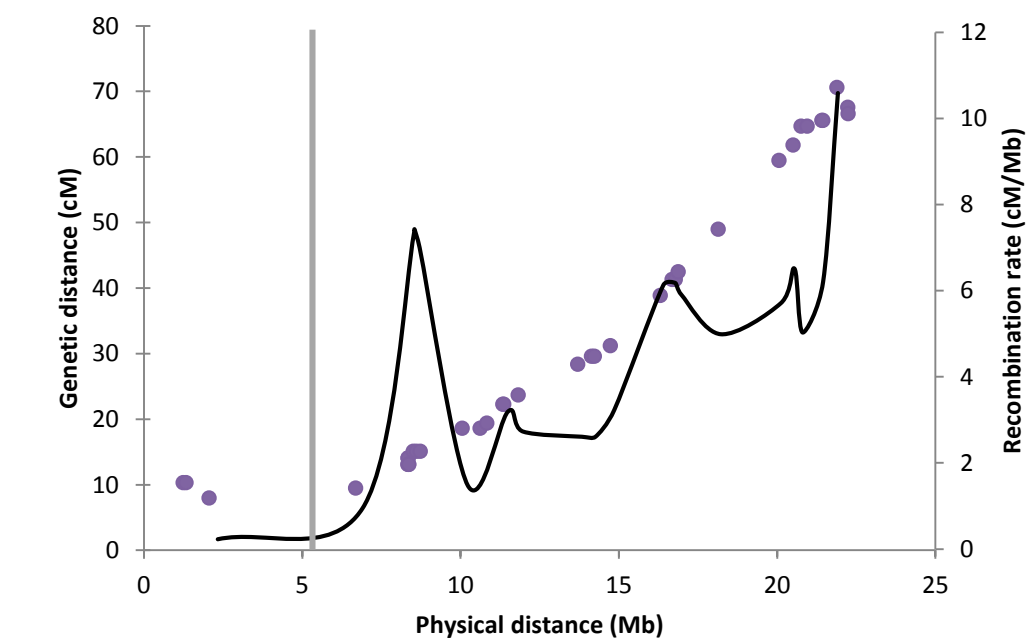**TxE Pp08**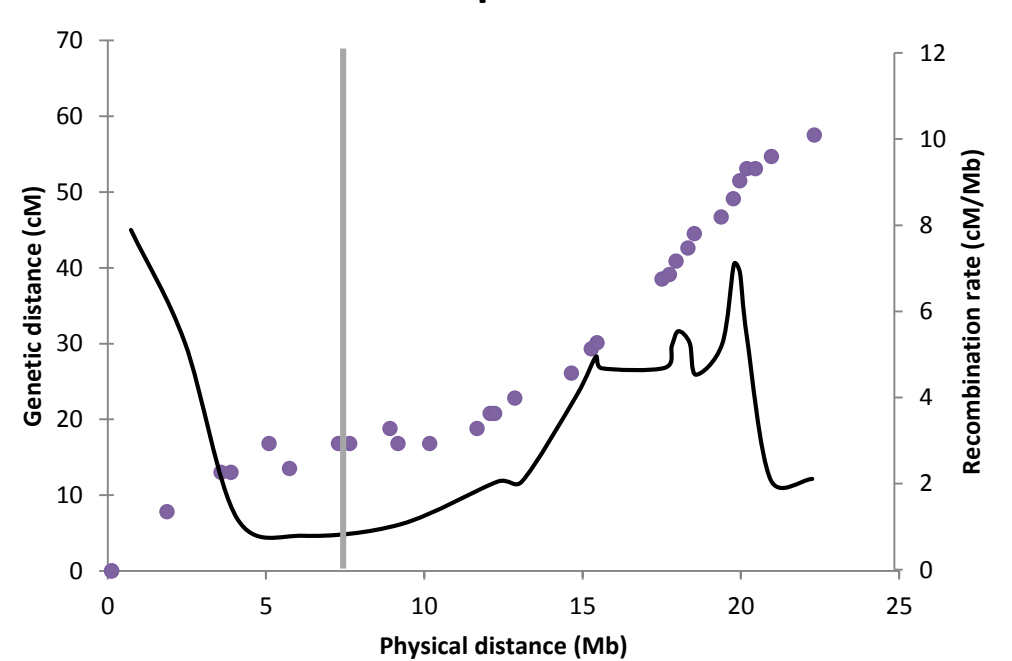

Supplement: 12864_2017_3606_MOESM4_ESM.pdf [file 12864_2017_3606_MOESM4_ESM.pdf]
